# Supplementary material for: The absence of interleukin 10 affects the morphology, differentiation, granule content and the production of cryptidin-4 in Paneth cells in mice
Source: PubMed Central journal article supplement (PMC6738610; doi:10.1371/journal.pone.0221618), 2019-09-11
Supplement: pone.0221618.s001.pdf [file pone.0221618.s001.pdf]

|                   | <b>Sense</b>                     | <b>Antisense</b>               |
|-------------------|----------------------------------|--------------------------------|
| <i>Cryptdin-1</i> | CTA GTC CTA CTC TTT GCC<br>CT    | TTG CAG CCT CTT GAT CTA<br>CA  |
| <i>Cryptdin-4</i> | GTC CAG GCT GAT CCT<br>ATC CA    | GGG GCA GCA GTA CAA<br>AAA TC  |
| <i>RegIIIγ</i>    | TTC CTG TCC TCC ATG ATC<br>AAA A | CAT CCA CCT CTG TTG GGT<br>TCA |
| <i>Lysozyme</i>   | CAA GAT CTA AGA ATG<br>CCT GTG   | TTC CGA ATA TAC TGG GAC<br>AG  |
| <i>GAPDH</i>      | TGA AGC AGG CAT CTG<br>AGG G     | CGA AGG TGG AAG AGT<br>GGG AG  |
