# Supplementary material for: The absence of interleukin 10 affects the morphology, differentiation, granule content and the production of cryptidin-4 in Paneth cells in mice
Source: PubMed Central journal article supplement (PMC6738610; doi:10.1371/journal.pone.0221618), 2019-09-11
Supplement: pone.0221618.s002.pdf [file pone.0221618.s002.pdf]

| Observations                                                                                                                                       | Score |
|----------------------------------------------------------------------------------------------------------------------------------------------------|-------|
| Grade 0: Normal appearance of anus and feces.                                                                                                      | 0     |
| Grade 1: Mild inflammation of anus, perirectal edema, occasional tenesmus and feces with normal or soft consistency.                               | 1     |
| Grade 2: Intermittent rectal prolapse, tenesmus, rectal edema, tenesmus feces with normal or soft consistency, mice need to be monitored more.     | 2     |
| Grade 3: Permanent prolapse, congestion and edema on rectal mucosa, diarrhea or absence of feces, blood on feces. Immediate euthanasia is advised. | 3     |
