# Supplementary material for: The absence of interleukin 10 affects the morphology, differentiation, granule content and the production of cryptidin-4 in Paneth cells in mice
Source: PubMed Central journal article supplement (PMC6738610; doi:10.1371/journal.pone.0221618), 2019-09-11

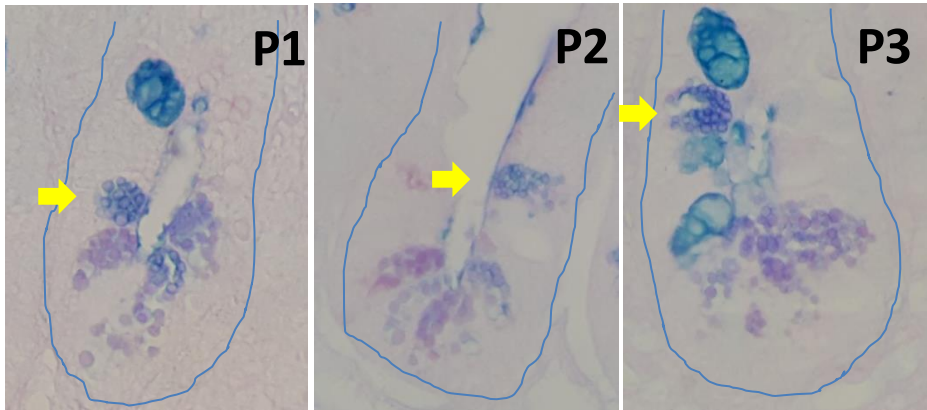

Supplement: pone.0221618.s003.pdf [file pone.0221618.s003.pdf]
